# Supplementary material
Source: HighWire-hosted journal article supplement (http://d2538ggaoe6cji.cloudfront.net/highwire/filestream/47220/field_highwire_adjunct_files/0/136531-1.pdf)
Supplement: 136531-1.pdf [file 136531-1.pdf]

**S1 Table. Experimental data extracted from published papers**

| Dataset    | Control     |                           | Treatment   |                           |
|------------|-------------|---------------------------|-------------|---------------------------|
|            | Time (days) | Volume (cm <sup>3</sup> ) | Time (days) | Volume (cm <sup>3</sup> ) |
| Roland     | 0.025       | 0.0023                    | 0.025       | 0.0023                    |
|            | 9.025       | 0.0278                    | 8.950       | 0.0116                    |
|            | 23.050      | 0.1250                    | 23.050      | 0.1181                    |
|            | 25.975      | 0.1435                    | 26.050      | 0.1389                    |
|            | 33.025      | 0.1991                    | 33.025      | 0.1435                    |
|            | 37.000      | 0.2986                    | 37.000      | 0.1875                    |
|            | 40.000      | 0.3356                    | 40.000      | 0.2130                    |
|            | 43.975      | 0.5694                    | 44.050      | 0.2407                    |
|            | 47.950      | 0.8241                    | 48.025      | 0.3426                    |
| Zibara     | 7.077       | 0.0198                    | 7.077       | 0.0198                    |
|            | 14.190      | 0.0553                    | 14.038      | 0.0316                    |
|            | 20.995      | 0.1536                    | 20.999      | 0.0434                    |
|            | 28.027      | 0.3229                    | 28.113      | 0.0789                    |
|            | 35.043      | 0.8938                    | 34.995      | 0.1694                    |
|            | 42.061      | 1.4411                    | 42.029      | 0.2678                    |
|            | 48.980      | 2.5394                    | 48.986      | 0.3898                    |
| Volk 2008  | 6.893       | 0.1730                    | 7.000       | 0.1604                    |
|            | 9.036       | 0.2170                    | 8.929       | 0.2484                    |
|            | 10.964      | 0.2925                    | 10.964      | 0.3302                    |
|            | 12.893      | 0.4434                    | 12.893      | 0.3679                    |
|            | 14.929      | 0.5881                    | 14.929      | 0.4434                    |
|            | 16.964      | 0.6761                    | 16.964      | 0.4560                    |
|            | 19.964      | 0.8208                    | 19.964      | 0.6006                    |
|            | 25.000      | 1.0723                    | 25.000      | 0.7390                    |
|            | 28.000      | 1.2170                    | 28.107      | 0.8459                    |
|            | 31.000      | 1.7453                    | 31.000      | 1.2799                    |
| 36.036     | 2.0786      | 36.036                    | 0.9465      |                           |
| Tan        | 14.000      | 0.1022                    | 14.000      | 0.1094                    |
|            | 17.790      | 0.3283                    | 17.790      | 0.1978                    |
|            | 21.631      | 0.5399                    | 21.631      | 0.2790                    |
|            | 25.420      | 0.7152                    | 25.472      | 0.2515                    |
|            | 29.210      | 0.9486                    | 29.261      | 0.3906                    |
|            | 33.051      | 1.3776                    | 33.000      | 0.4645                    |
|            | 36.892      | 1.8066                    | 36.892      | 0.5674                    |
|            | 14.000      | 0.1022                    | 14.000      | 0.1094                    |
| Volk 2011a | 6.016       | 0.0773                    | 5.854       | 0.0988                    |
|            | 9.756       | 0.1639                    | 9.919       | 0.1567                    |
|            | 12.846      | 0.2504                    | 12.846      | 0.2288                    |

|        |        |        |        |
|--------|--------|--------|--------|
| 16.911 | 0.3154 | 16.911 | 0.3370 |
| 18.862 | 0.4305 | 18.862 | 0.4305 |
| 20.813 | 0.5958 | 20.813 | 0.4666 |
| 23.902 | 0.9048 | 23.902 | 0.4311 |
| 27.967 | 1.1349 | 27.805 | 0.5249 |
| 30.894 | 1.2071 | 30.894 | 0.6760 |
| 33.821 | 1.4155 | 33.984 | 0.8127 |
| 38.049 | 1.7534 | 37.886 | 1.0787 |
| 40.813 | 1.9690 | 40.976 | 1.1724 |
| 44.878 | 2.0987 | 44.878 | 1.3379 |
| 47.805 | 2.0919 | 47.967 | 1.5895 |
|        |        | 52.033 | 1.8412 |
|        |        | 54.959 | 1.9564 |
|        |        | 59.024 | 2.0430 |
|        |        | 61.951 | 2.0433 |

---

|            |        |        |        |        |
|------------|--------|--------|--------|--------|
| Volk 2011b | 6.810  | 0.1071 | 6.971  | 0.1071 |
|            | 10.831 | 0.2357 | 10.992 | 0.1786 |
|            | 14.853 | 0.3214 | 15.013 | 0.2643 |
|            | 17.748 | 0.4429 | 17.909 | 0.4286 |
|            | 20.804 | 0.5714 | 20.804 | 0.5643 |
|            | 22.895 | 0.7643 | 22.895 | 0.6500 |
|            | 25.791 | 1.2000 | 25.952 | 0.7857 |
|            | 28.847 | 1.6000 | 29.008 | 0.9357 |
|            | 32.064 | 1.7143 | 31.903 | 1.1857 |
|            | 35.925 | 1.9429 | 35.925 | 1.8000 |
|            | 38.820 | 1.9714 | 38.981 | 1.8429 |
|            | 43.003 | 1.9786 | 43.003 | 1.9357 |

---
